# Supplementary material for: The wheat stem rust resistance gene Sr43 encodes an unusual protein kinase
Source: Nat Genet. 2023 May 22;55(6):921–6. doi: 10.1038/s41588-023-01402-1 (PMC10260397; doi:10.1038/s41588-023-01402-1)
Supplement: Supplementary file 1 — Supplementary Figs. 1–17. [file 41588_2023_1402_MOESM1_ESM.pdf]

# The wheat stem rust resistance gene *Sr43* encodes an unusual protein kinase

In the format provided by the  
authors and unedited

## Table of Contents

|                                                                                                                                                                     |    |
|---------------------------------------------------------------------------------------------------------------------------------------------------------------------|----|
| Supplementary Fig. 1: Genotyping-by-sequencing (GBS) plot of the <i>Sr43</i> wheat- <i>Th. elongatum</i> introgression wild type line.....                          | 2  |
| Supplementary Fig. 2: GBS plot of the <i>Sr43</i> wheat- <i>Th. elongatum</i> introgression EMS mutant 31b.....                                                     | 3  |
| Supplementary Fig. 3: GBS plot of the <i>Sr43</i> wheat- <i>Th. elongatum</i> introgression EMS mutant 187g. ....                                                   | 4  |
| Supplementary Fig. 4: GBS plot of the <i>Sr43</i> wheat- <i>Th. elongatum</i> introgression EMS mutant 276b. ....                                                   | 5  |
| Supplementary Fig. 5: GBS plot of the <i>Sr43</i> wheat- <i>Th. elongatum</i> introgression EMS mutant 450b. ....                                                   | 6  |
| Supplementary Fig. 6: GBS plot of the <i>Sr43</i> wheat- <i>Th. elongatum</i> introgression EMS mutant 706f.....                                                    | 7  |
| Supplementary Fig. 7: GBS plot of the <i>Sr43</i> wheat- <i>Th. elongatum</i> introgression EMS mutant 1013a.....                                                   | 8  |
| Supplementary Fig. 8: GBS plot of the <i>Sr43</i> wheat- <i>Th. elongatum</i> introgression EMS mutant 1102h.....                                                   | 9  |
| Supplementary Fig. 9: GBS plot of the <i>Sr43</i> wheat- <i>Th. elongatum</i> introgression EMS mutant 1298g.....                                                   | 10 |
| Supplementary Fig. 10: GBS plot of the <i>Sr43</i> wheat- <i>Th. elongatum</i> introgression EMS mutant 1513d.....                                                  | 11 |
| Supplementary Fig. 11: GBS plot of the <i>Sr43</i> wheat- <i>Th. elongatum</i> introgression EMS mutant 1671a.....                                                  | 12 |
| Supplementary Fig. 12: Amino acid alignment between <i>Sr43</i> and STKc IRAK.....                                                                                  | 13 |
| Supplementary Fig. 13: Amino acid alignment between <i>Sr43</i> and cAPK- $\alpha$ .....                                                                            | 14 |
| Supplementary Fig. 14: Schematic representation of the phosphorylation reaction and MASCOT search results.....                                                      | 15 |
| Supplementary Fig. 15: Mass spectra of the peptides that are targeted by His6-MBP- <i>Sr43</i> for phosphorylation of residues T54, S74, S115, T129 and Y177.....   | 16 |
| Supplementary Fig. 16: Mass spectra of the peptides that are targeted by His6-MBP- <i>Sr43</i> for phosphorylation of residues S234, T250, S256, S264 and S307..... | 17 |
| Supplementary Fig. 17, Regression of calculated reference gene copy number on theoretical reference gene copy number.....                                           | 18 |

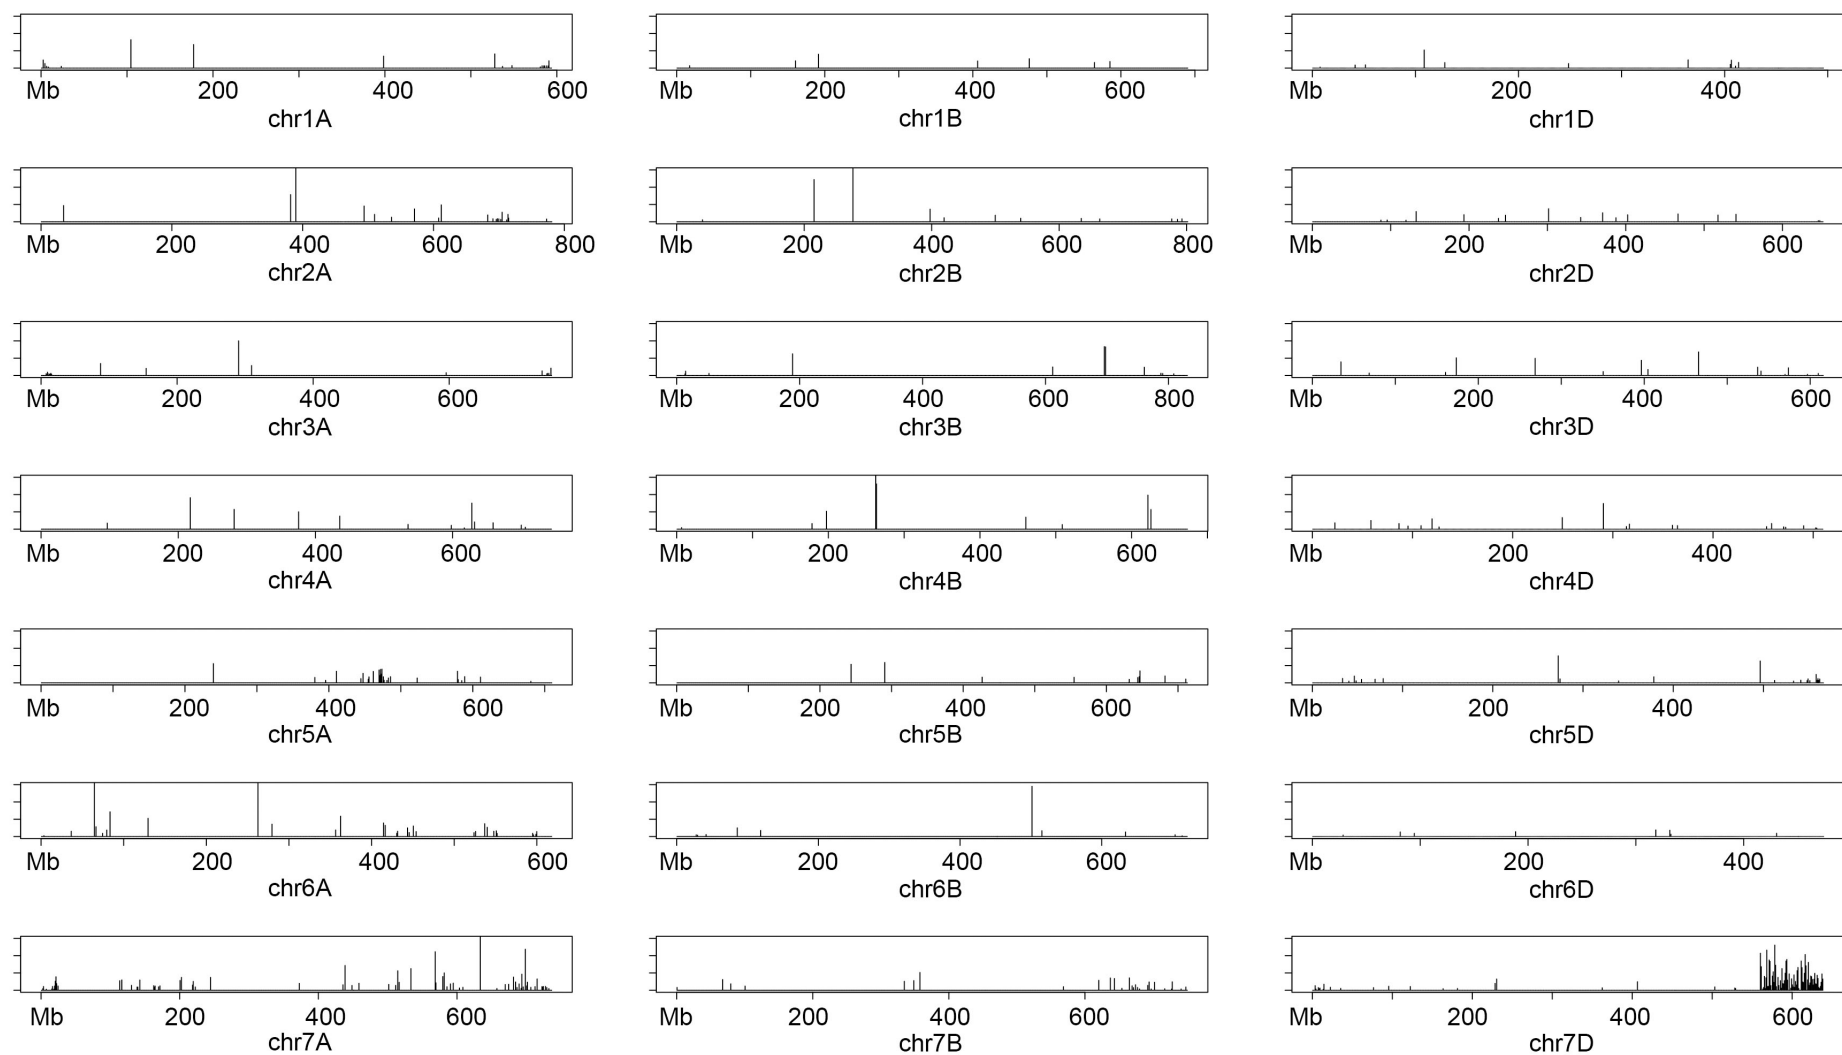

**Supplementary Fig. 1: Genotyping-by-sequencing (GBS) plot of the *Sr43* wheat-*Th. elongatum* introgression wild type line.** The SNP frequency was plotted in 10 Mb bins along the length of each chromosome relative to wheat cv. Chinese Spring.

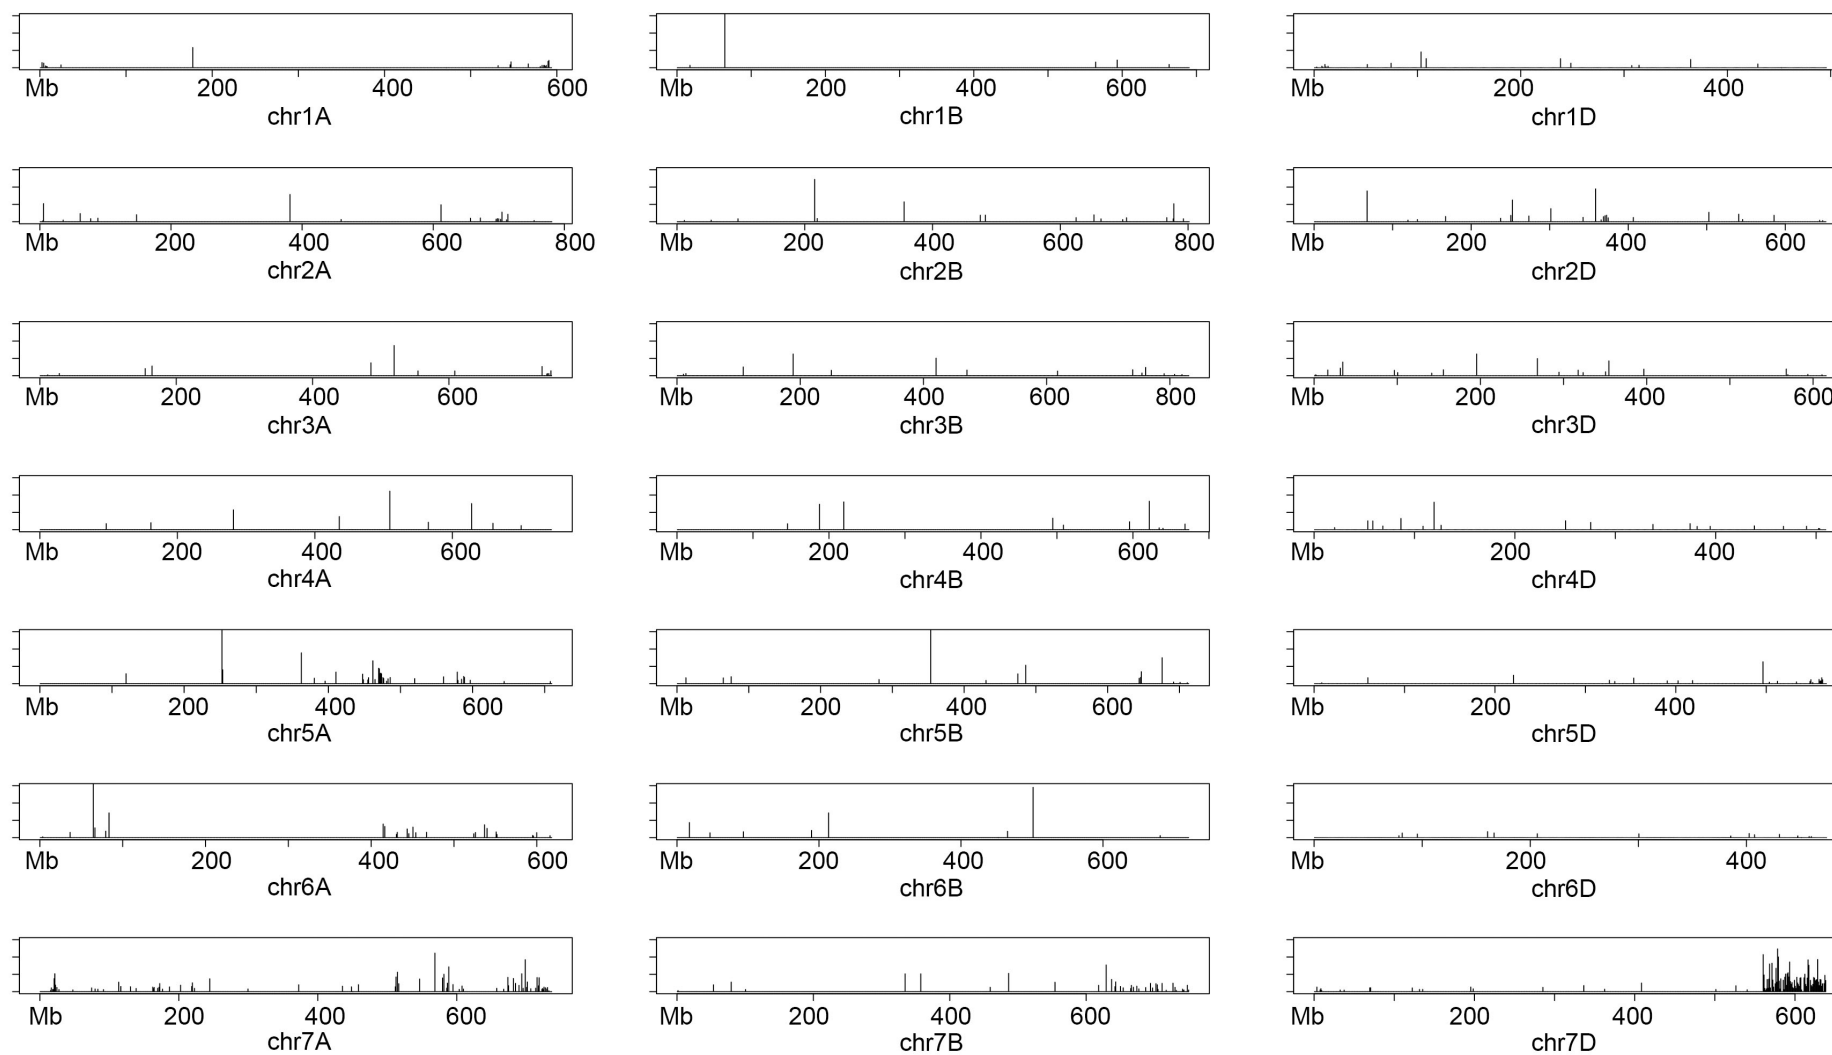

**Supplementary Fig. 2: GBS plot of the *Sr43* wheat-*Th. elongatum* introgression EMS mutant 31b.**

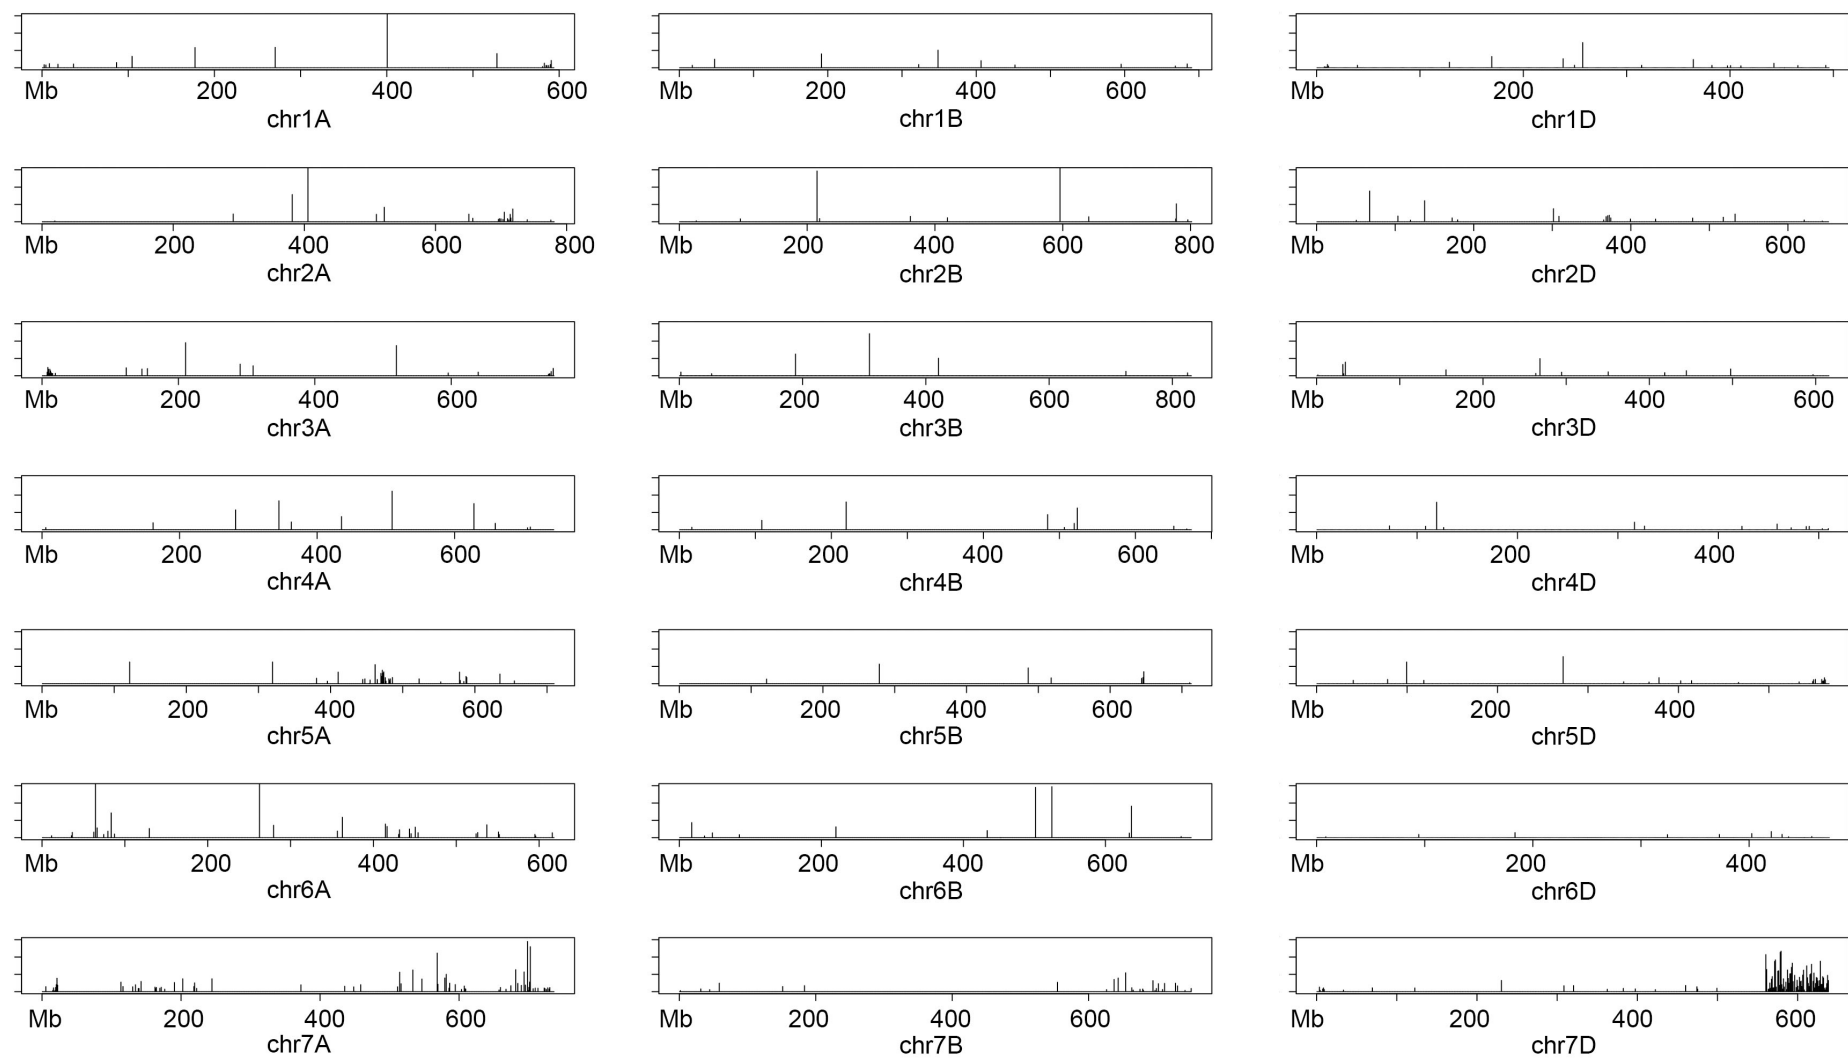

**Supplementary Fig. 3: GBS plot of the *Sr43* wheat-*Th. elongatum* introgression EMS mutant 187g.**

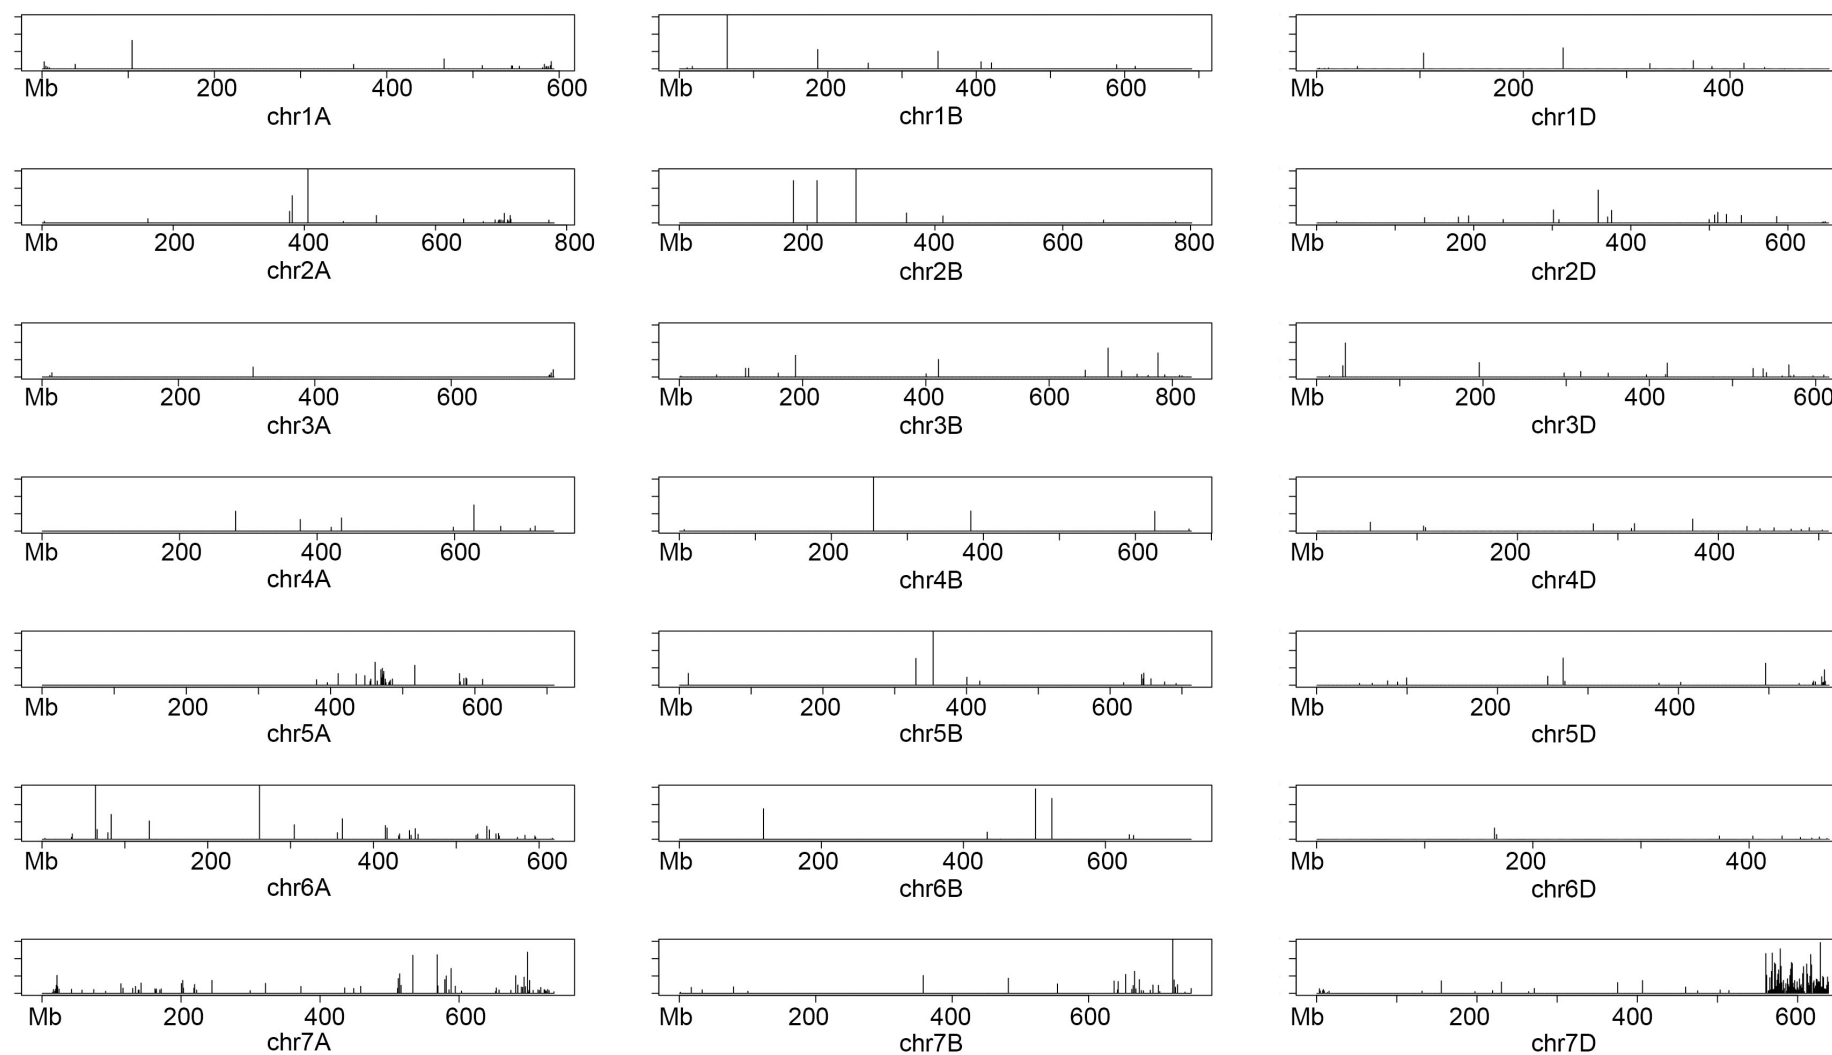

**Supplementary Fig. 4: GBS plot of the *Sr43* wheat-*Th. elongatum* introgression EMS mutant 276b.**

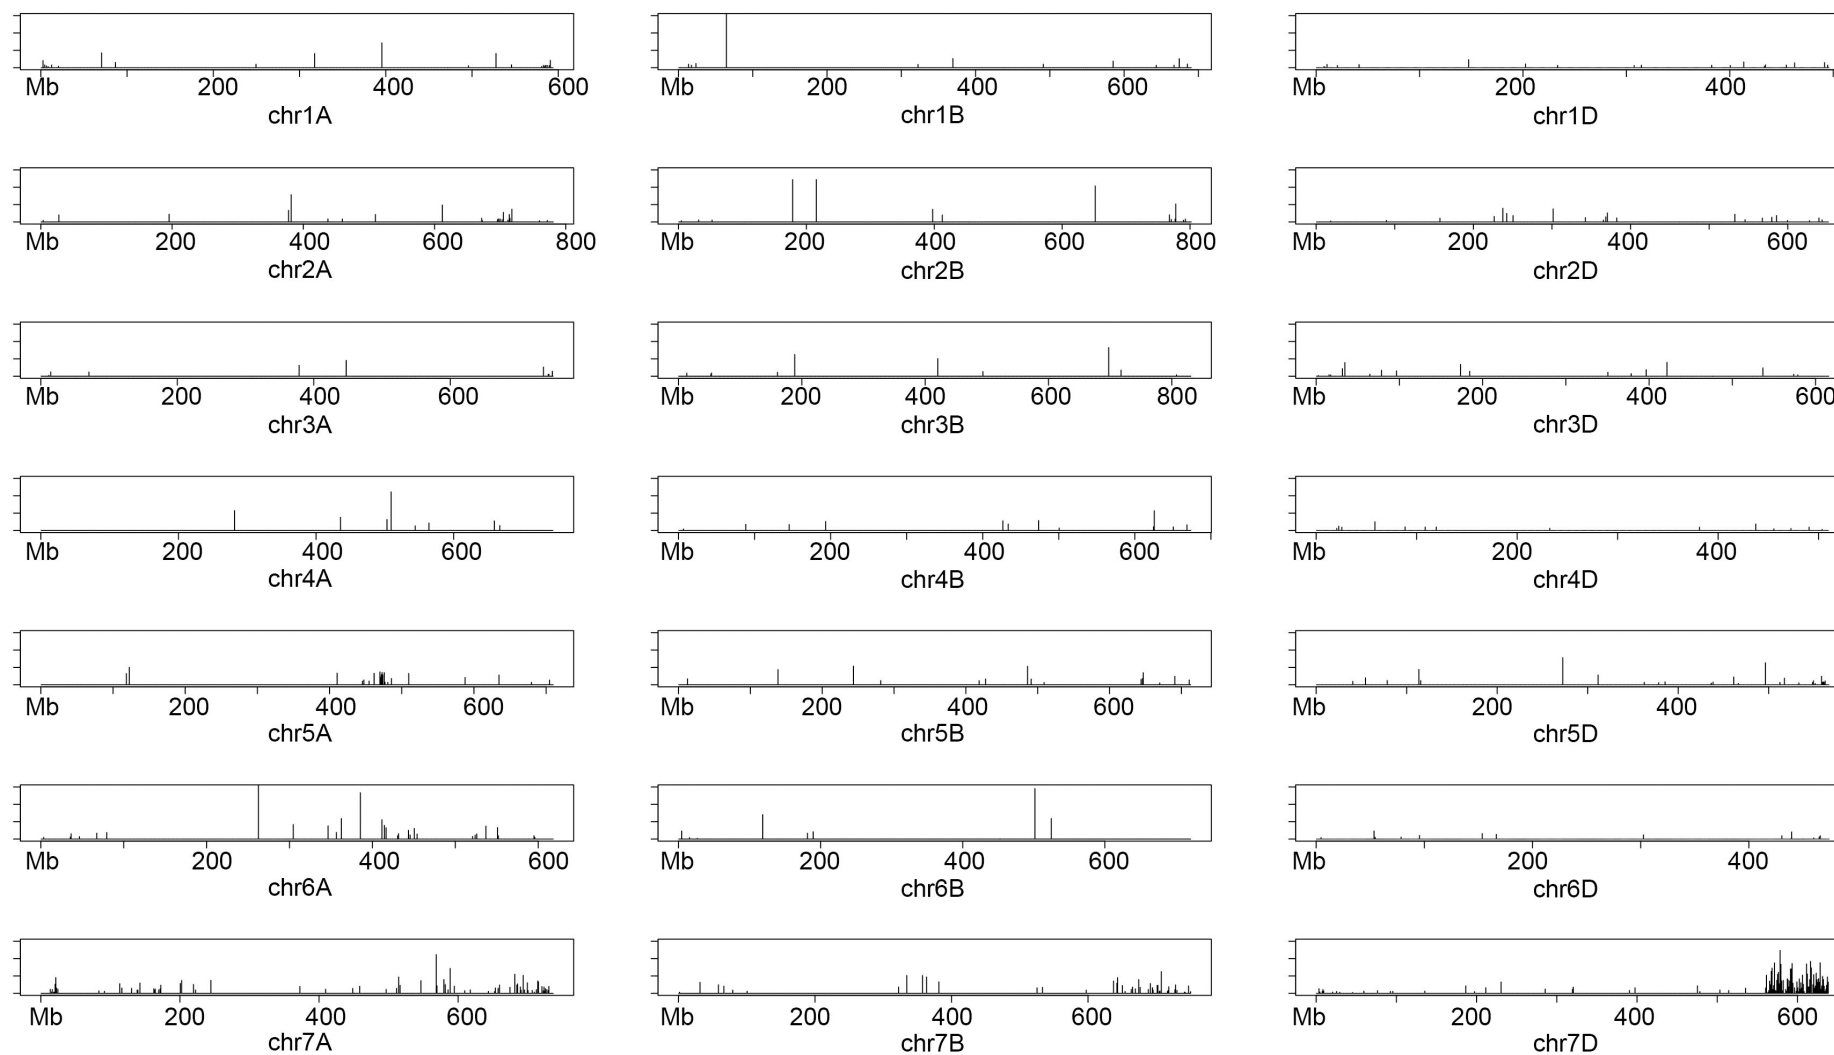

**Supplementary Fig. 5: GBS plot of the *Sr43* wheat-*Th. elongatum* introgression EMS mutant 450b.**

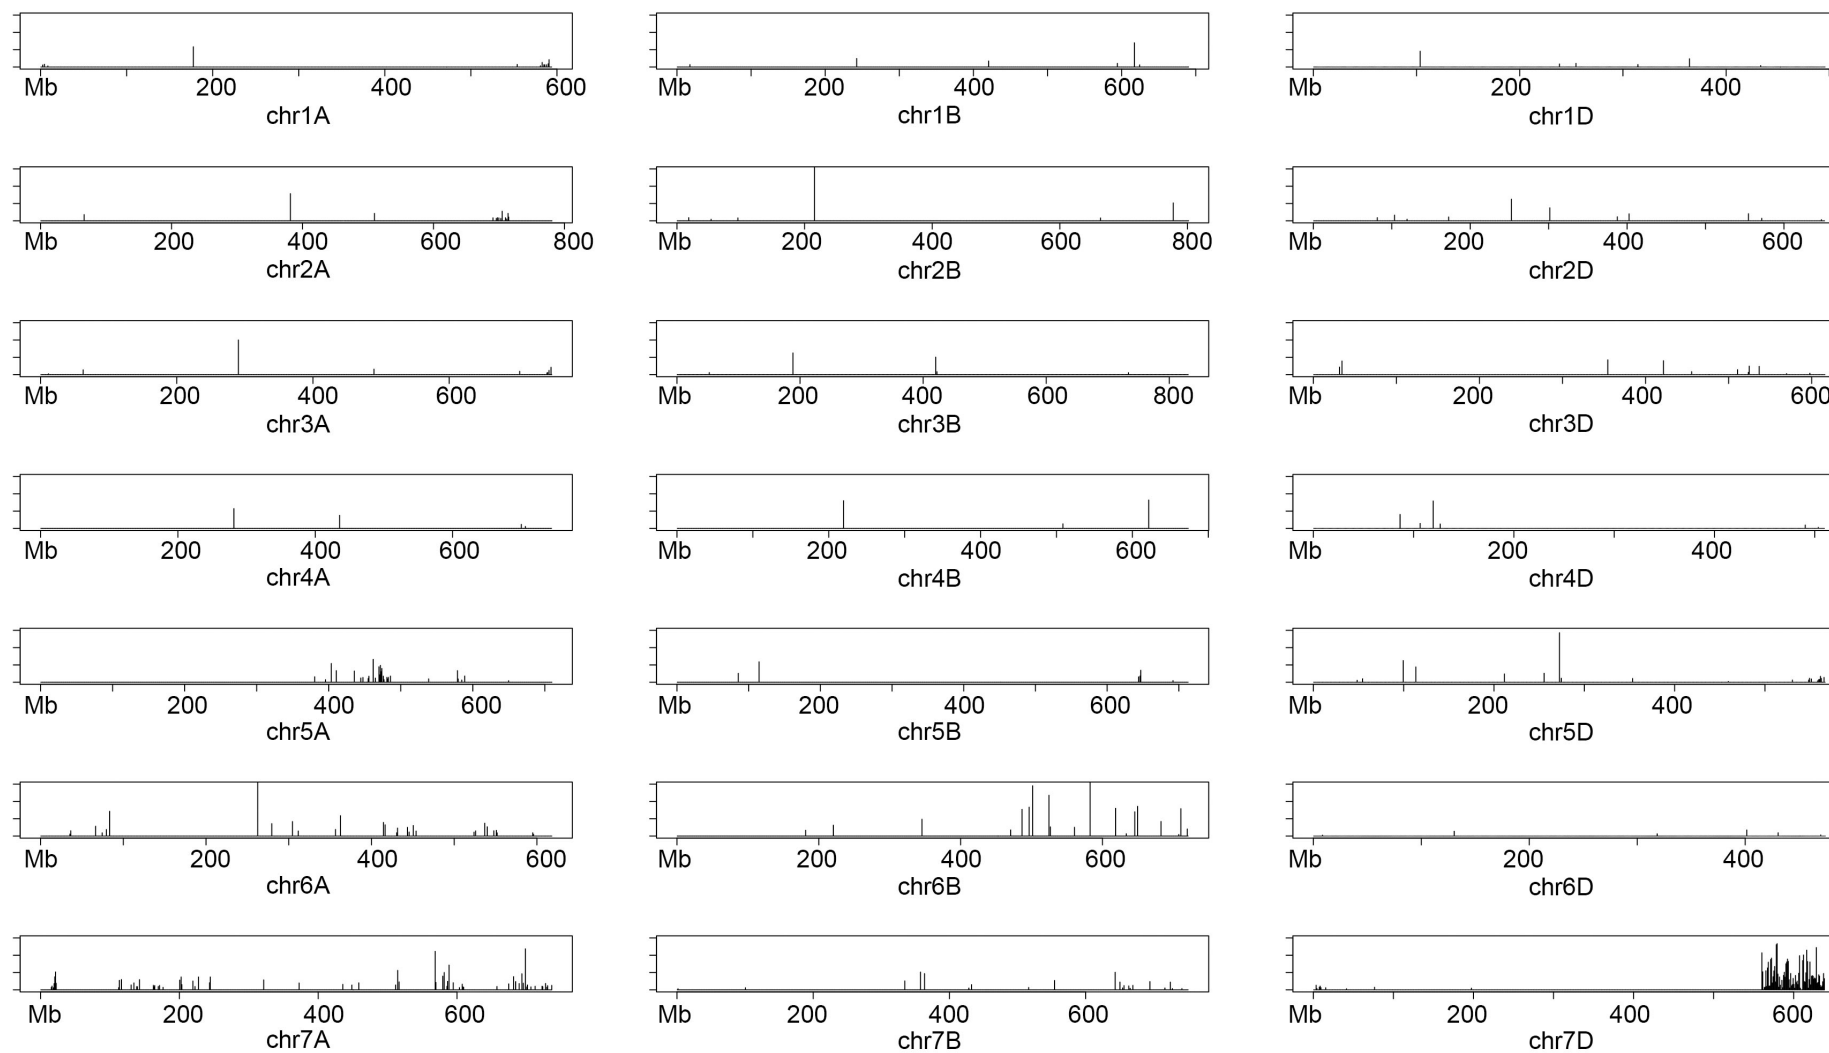

**Supplementary Fig. 6: GBS plot of the *Sr43* wheat-*Th. elongatum* introgression EMS mutant 706f.**

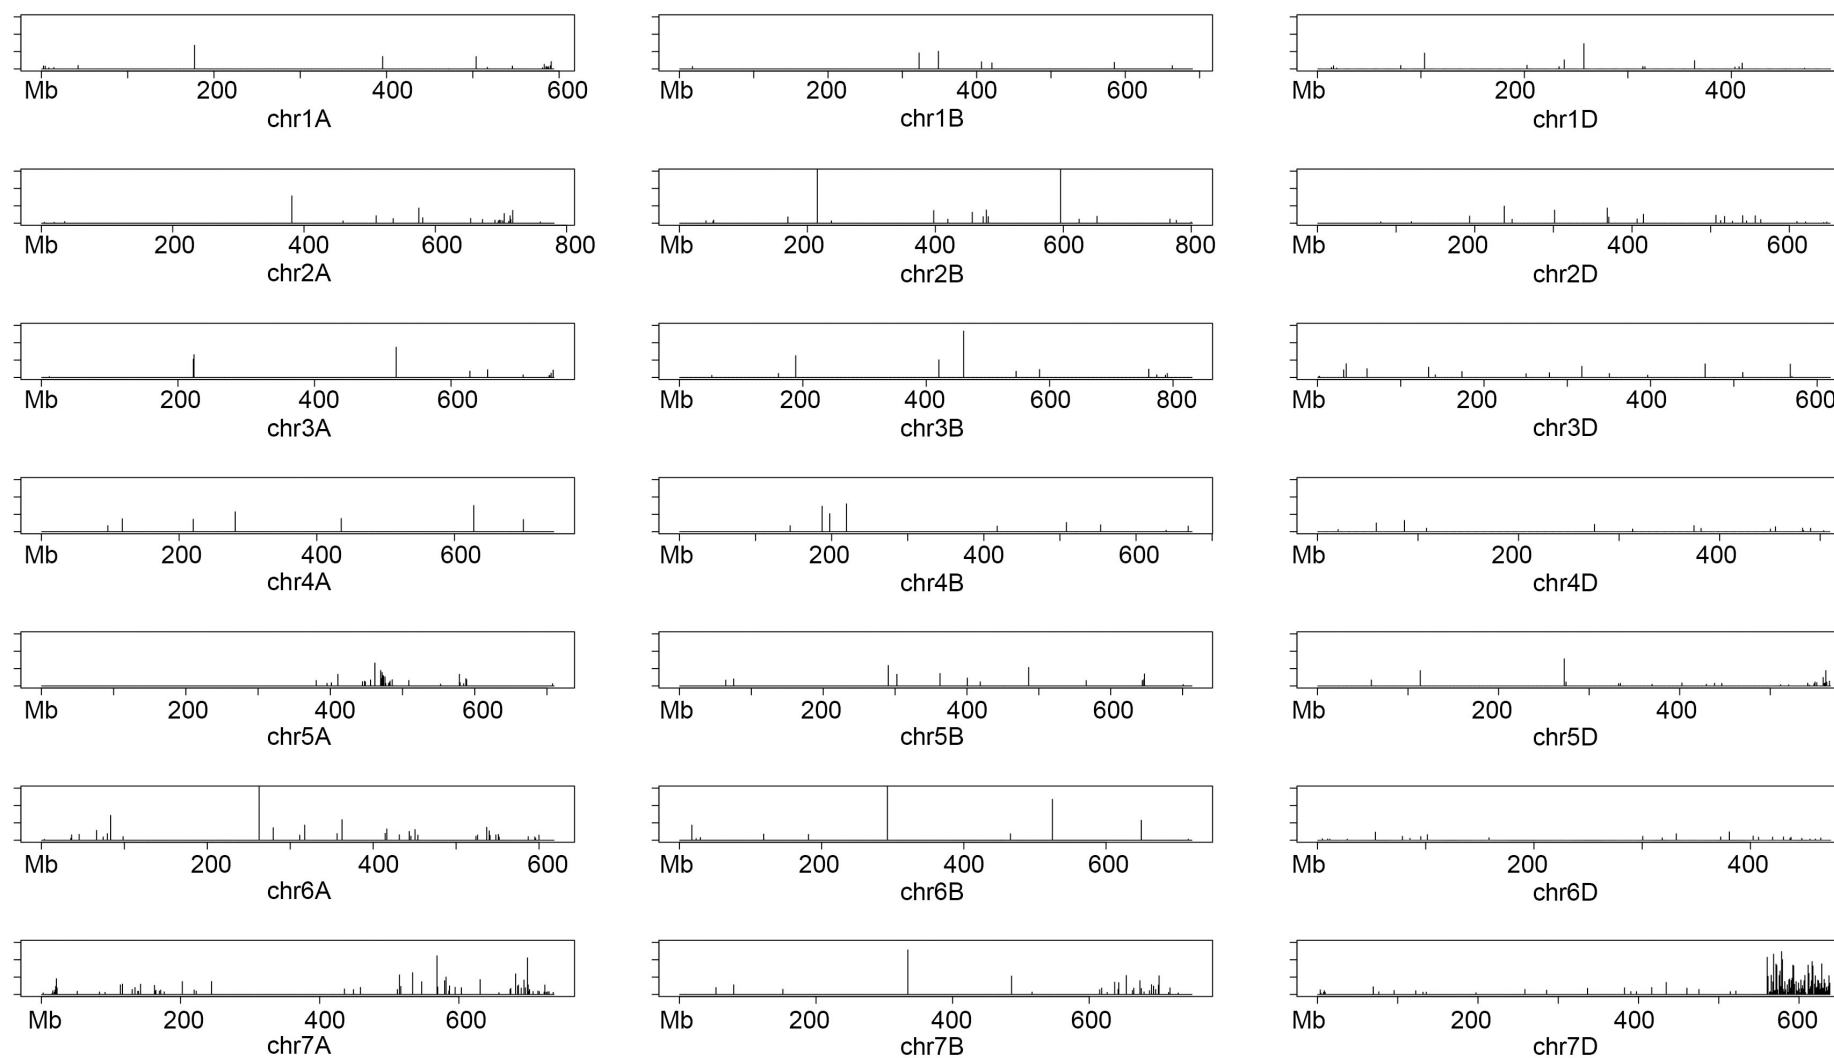

**Supplementary Fig. 7: GBS plot of the *Sr43* wheat-*Th. elongatum* introgression EMS mutant 1013a.**

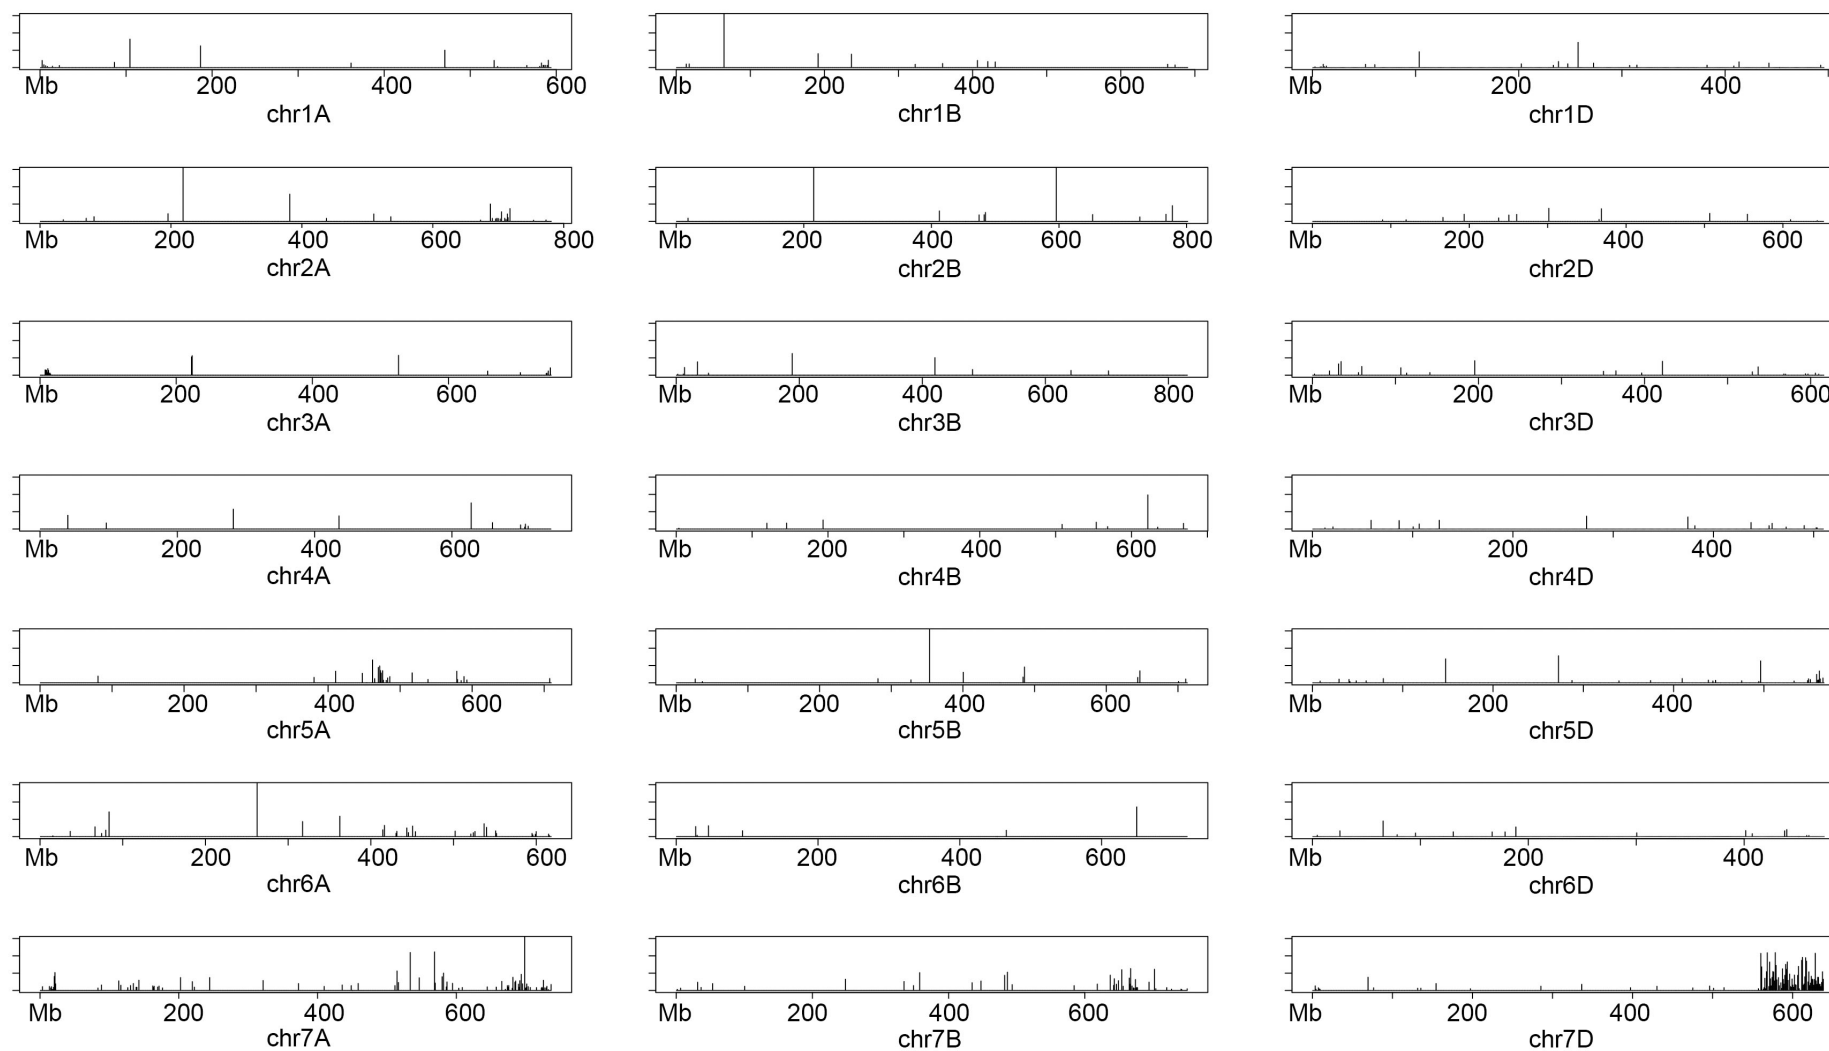

**Supplementary Fig. 8: GBS plot of the *Sr43* wheat-*Th. elongatum* introgression EMS mutant 1102h.**

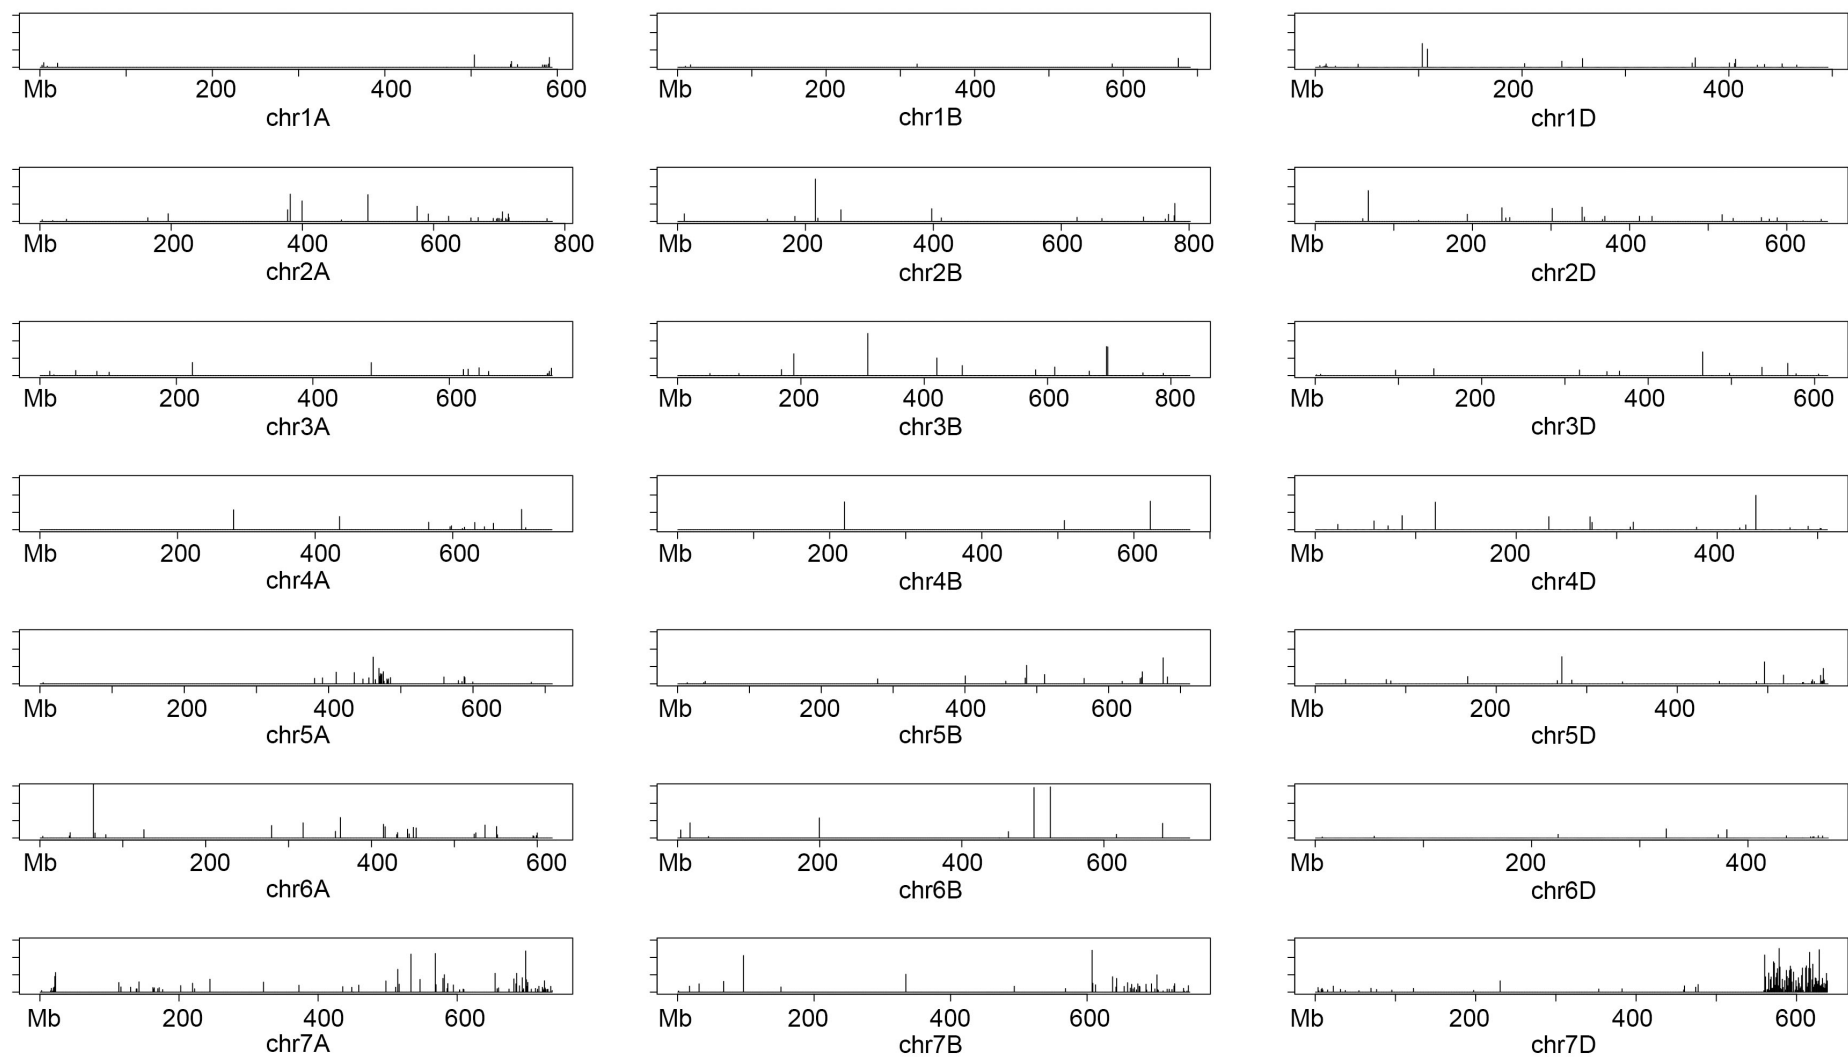

**Supplementary Fig. 9: GBS plot of the *Sr43* wheat-*Th. elongatum* introgression EMS mutant 1298g.**

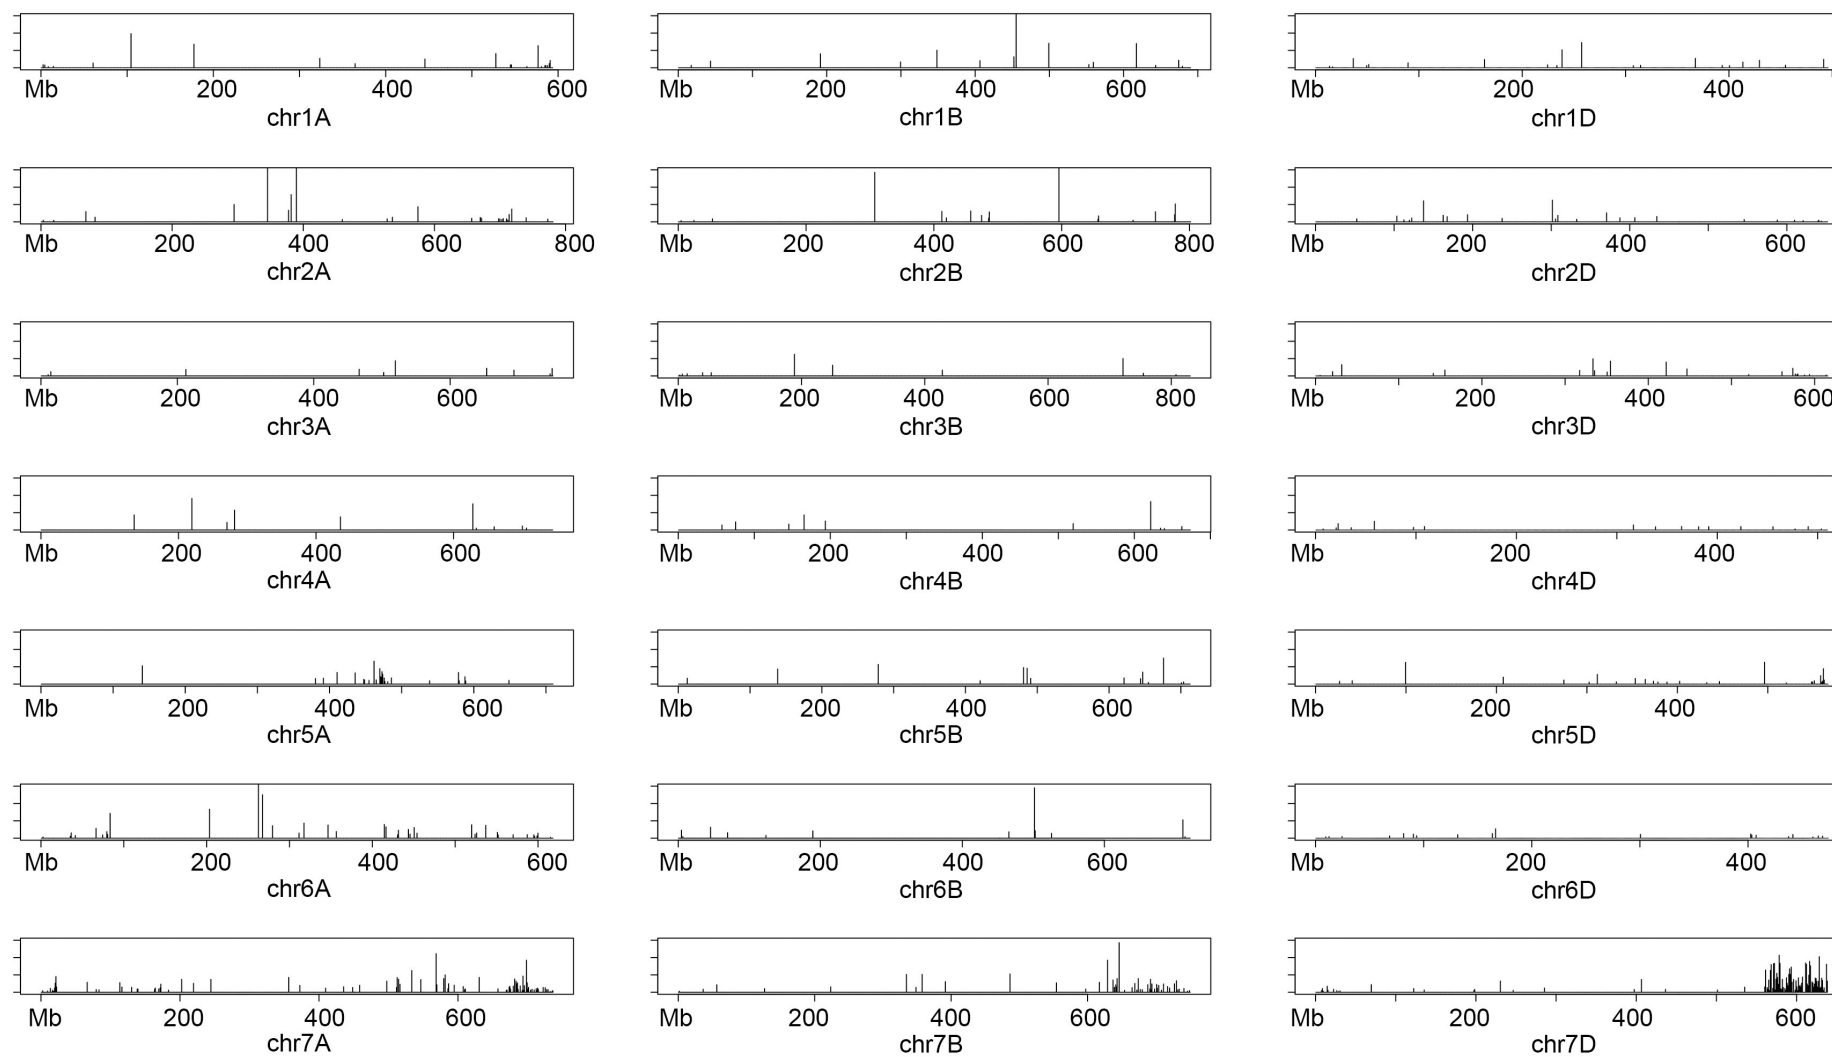

**Supplementary Fig. 10: GBS plot of the *Sr43* wheat-*Th. elongatum* introgression EMS mutant 1513d.**

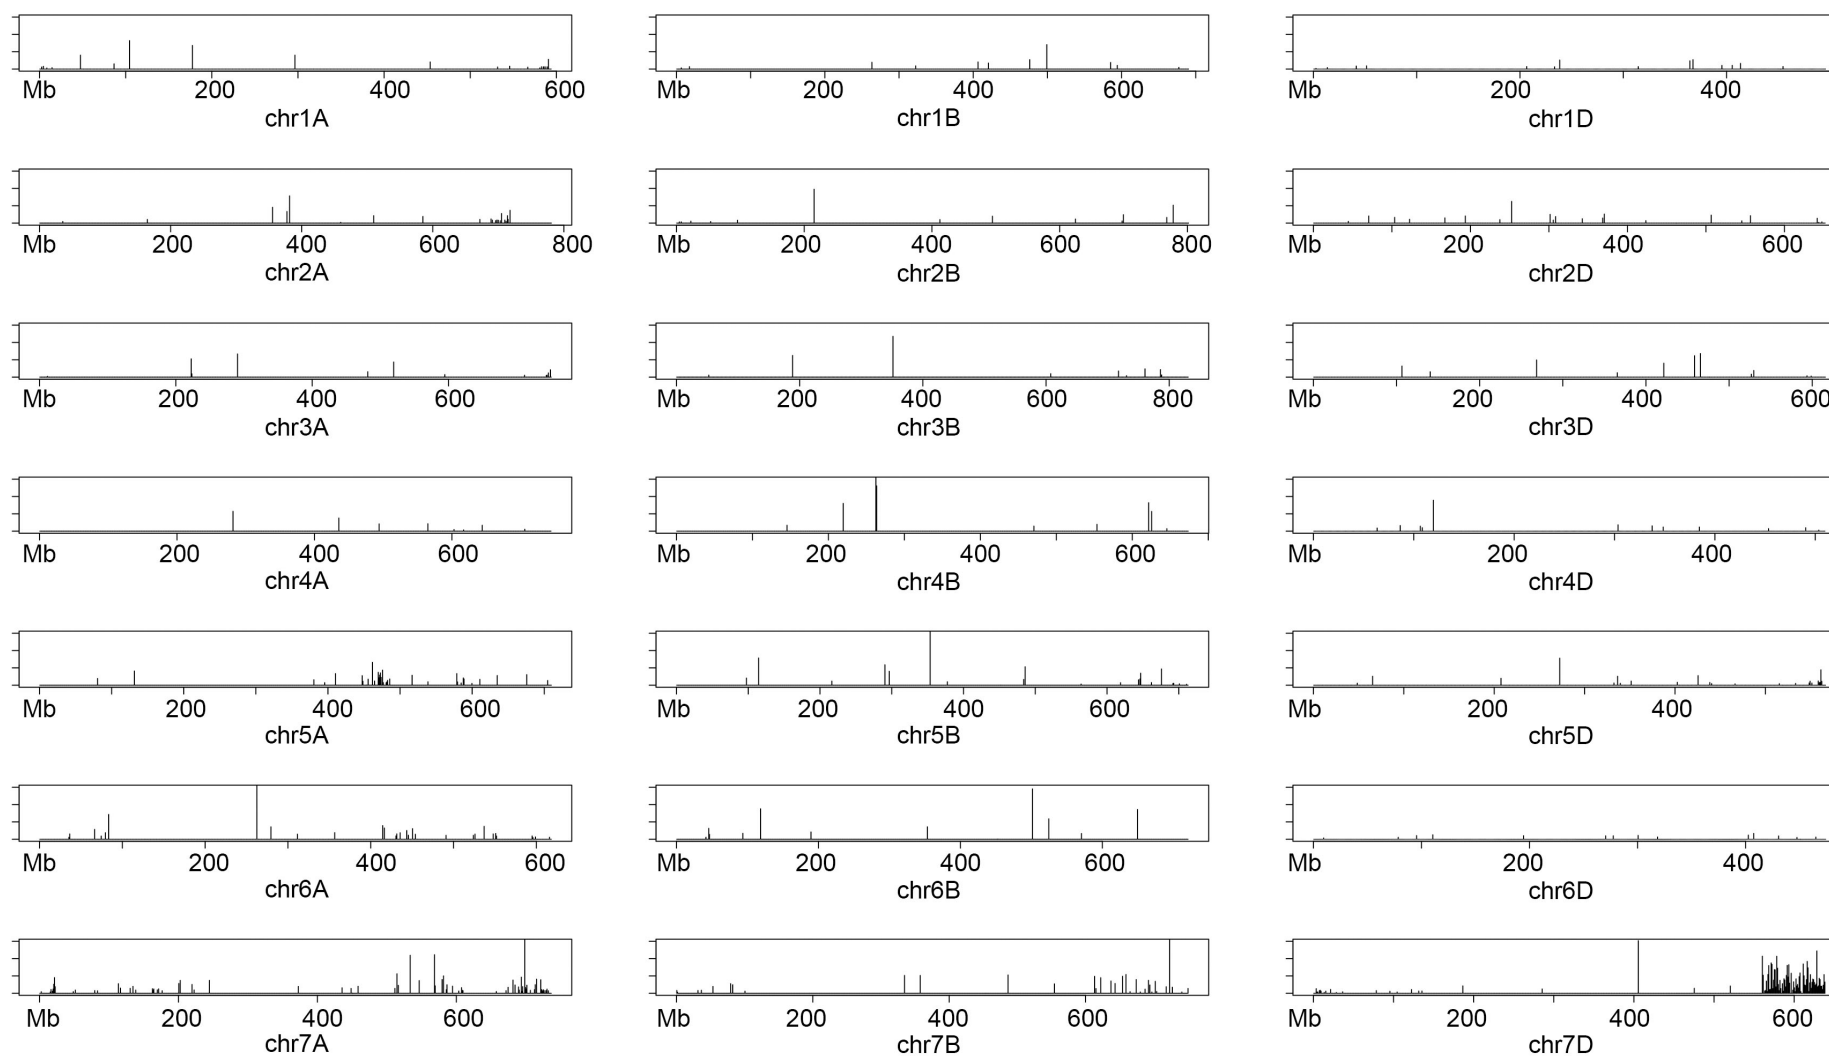

**Supplementary Fig. 11: GBS plot of the *Sr43* wheat-*Th. elongatum* introgression EMS mutant 1671a.**

|           |     |                                                      |     |
|-----------|-----|------------------------------------------------------|-----|
| Sr43      | 1   | SYHLLGEITNGFSE-----NRKLGTGAYGSVYKGEHKDGEKIAVKMLHD    | 44  |
|           |     | ::: ..: . .  .. : .:. . .   :::..: . . ..            |     |
| STKc_IRAK | 1   | SFYELKNVTNNFDERPISVGGNKMGEFGVYKGYVNNTTVAVKKLAA       | 49  |
| Sr43      | 45  | TLGLDNE----QFEKEYFNLADLQHKNIIVRLVGYPCHETRRECVPYNGRMV | 90  |
|           |     | ..:..   :: ..: .:. . : .:. : :..:..:                 |     |
| STKc_IRAK | 50  | MVDITTEELKQQFDQEIKVMAKCQHENLVELLGFSSDGDLC-----       | 91  |
| Sr43      | 91  | FADITKRALCFEYMRNGG-LDK--CLSDETSGHDWCTRYSIKIGICEGLK   | 137 |
|           |     | .: . . .  ::      . .:. .:. . .: ..: :               |     |
| STKc_IRAK | 92  | -----LVYVYMPNGSLLDRLSCL-DGTPPLSWHMRCKIAQGAANGIN      | 132 |
| Sr43      | 138 | YLHEELESMPYHLDLKPANILLDEKMVPKIADFGLSRFF-RGEQSQITKS   | 186 |
|           |     | :     ::: .:. . . . . . . . . . . .:. : : ..         |     |
| STKc_IRAK | 133 | FLH---ENHHIHRDIKSANILLDEAFTAKISDFGLARASEKFAQTVMTSR   | 179 |
| Sr43      | 187 | AIGTHGYVPPEYIDASVLSIKFDIFSLGVVVIKIMTGPTGYFRSAE----   | 232 |
|           |     | .: . . .:. . :..: .: .:. . . : : : . . ..:..:        |     |
| STKc_IRAK | 180 | IVGTTAYMAPEALRGEI-TPKSDIYSFGVVLLEIITGLPAVDEHREPQLL   | 228 |
| Sr43      | 233 | MSAKQFIELVLANWRKRLPATSVYLLESY-----SEQVKRCTAIAV       | 273 |
|           |     | :. : .   ..: .:.    ..: : : : : : : : : : :          |     |
| STKc_IRAK | 229 | LDIKEEIE-----DEEKTIEDYIDKKMNDADSTSVEAMYSVAS          | 266 |
| Sr43      | 274 | SCVEADRSKRPSIGEIVNKLNETETM 299                       |     |
|           |     | .: :..: . . :..: .:. : : : : : : : : : :             |     |
| STKc_IRAK | 267 | QCLHEKKNKRPDIKKVQQLQEMTAS 292                        |     |

**Supplementary Fig. 12: Amino acid alignment between Sr43 and STKc IRAK.** The identity is 30.4%, and the e-value is 2.06e-60.

|                |     |                                                                                                   |     |
|----------------|-----|---------------------------------------------------------------------------------------------------|-----|
| cAPK- $\alpha$ | 1   | LGT <sup>52</sup> GSFGRVMLVKHMETGNHYAM <sup>72</sup> KI-----LDKQKVVK----LKQIEHT                   | 40  |
|                |     | :: .  ...: .  ...: :  ::...   ...:                                                                |     |
| Sr43_kinase    | 1   | LGTGAYGSVYKGEHKD-GEKIAV <sup>91</sup> KMLHDTLGLDNEQFEKEYFNLADLQH-                                 | 48  |
| cAPK- $\alpha$ | 41  | LN <sup>91</sup> EKRILQAVNF-----PFLVKLEFSFKDNSNLYMVMEYVPGGEMF                                     | 81  |
|                |     | .  :: .  :  ::...: :  ::...:   ::...:                                                             |     |
| Sr43_kinase    | 49  | ---KNIVRLVGYCHETRRECVPYNGRMVFA--DITKRALCFEYMRNGGLD                                                | 93  |
| cAPK- $\alpha$ | 82  | SHLRRIGRFSEPHARFYAAQ-----IVLTFEYLH---SLDLIYR <sup>166</sup> DLKPE                                 | 122 |
|                |     | .. .  ::...: :  ::...:   ::...:   ::...:                                                          |     |
| Sr43_kinase    | 94  | KCLS-----DETSGHDWCTRYSIKIGICEGLKYLHEELES <sup>171</sup> PMYHLD <sup>184</sup> KPA <sup>186</sup>  | 138 |
| cAPK- $\alpha$ | 123 | NLLIDQQGYIQVTD <sup>171</sup> FGFAKRVKGR----TWTLCGTPEYLAPE <sup>208</sup> IILSKGYN                | 168 |
|                |     | : : ::...:   ::...:   ::...:   ::...:   ::...:                                                    |     |
| Sr43_kinase    | 139 | NILLDEKMVPKIA <sup>171</sup> D <sup>184</sup> FLSRFFRGEQSQITKSAIGTHGYVPP <sup>186</sup> EYIDASVLS | 188 |
| cAPK- $\alpha$ | 169 | KAVDWWALGVLIYEMAAGYPPFF-----ADQPIQIYEKIVSGKVRFPS-                                                 | 211 |
|                |     | ... : : ::...:   ::...:   ::...:   ::...:   ::...:                                                |     |
| Sr43_kinase    | 189 | IKFDIFSLGVVLIKIMTGPTGYFRSAEMSAKQFIELV--LANWRKRLPAT                                                | 236 |
| cAPK- $\alpha$ | 212 | -----HFSSDLK---DLLRNLLQVDLTK <sup>280</sup> R--FGNLKDGVN <sup>244</sup> DIK                       | 244 |
|                |     | .. : :   ::...:   ::...:   ::...:   ::...:                                                        |     |
| Sr43_kinase    | 237 | SVYLLESYSEQVKRCTAIAVSCVEADRSK <sup>280</sup> RPSIGEIVNKLNETE                                      | 280 |

**Supplementary Fig. 13: Amino acid alignment between Sr43 and cAPK- $\alpha$  (Hanks, et al. 1988, DOI: 10.1126/science.3291115).** Eight out of nine key amino acids are conserved in the Sr43 kinase. The numbers in red are the positions of nine key conserved amino acids of cAPK- $\alpha$ .

a

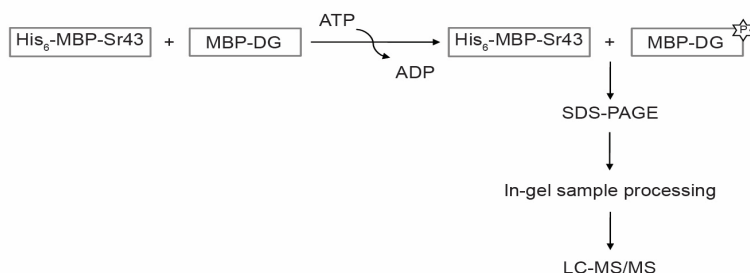

b

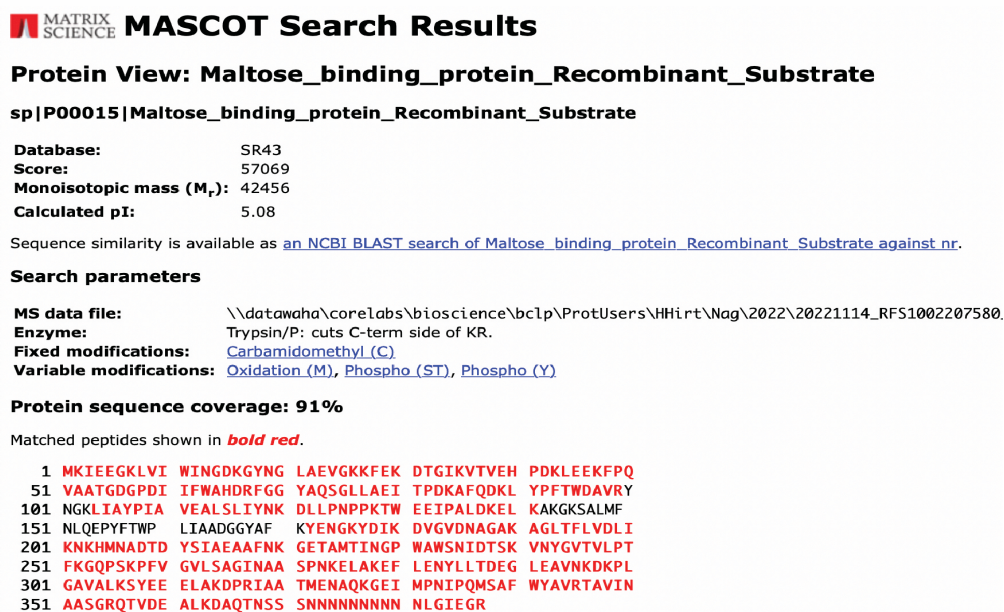

c

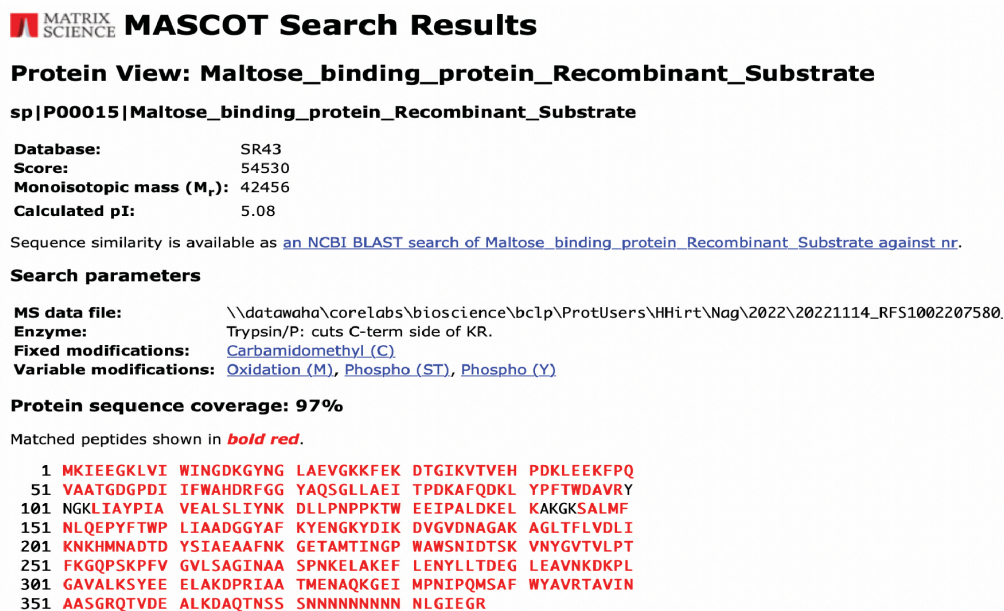

**Supplementary Fig. 14. Schematic representation of the phosphorylation reaction and MASCOT search results.** **a**, Schematic representation of the phosphorylation reaction and the sample preparation for LC-MS/MS analyses. **b**, Protein sequence coverage of maltose binding protein alone in the absence of His<sub>6</sub>-MBP-Sr43. **c**, Protein sequence coverage of maltose binding protein alone in the presence of His<sub>6</sub>-MBP-Sr43.

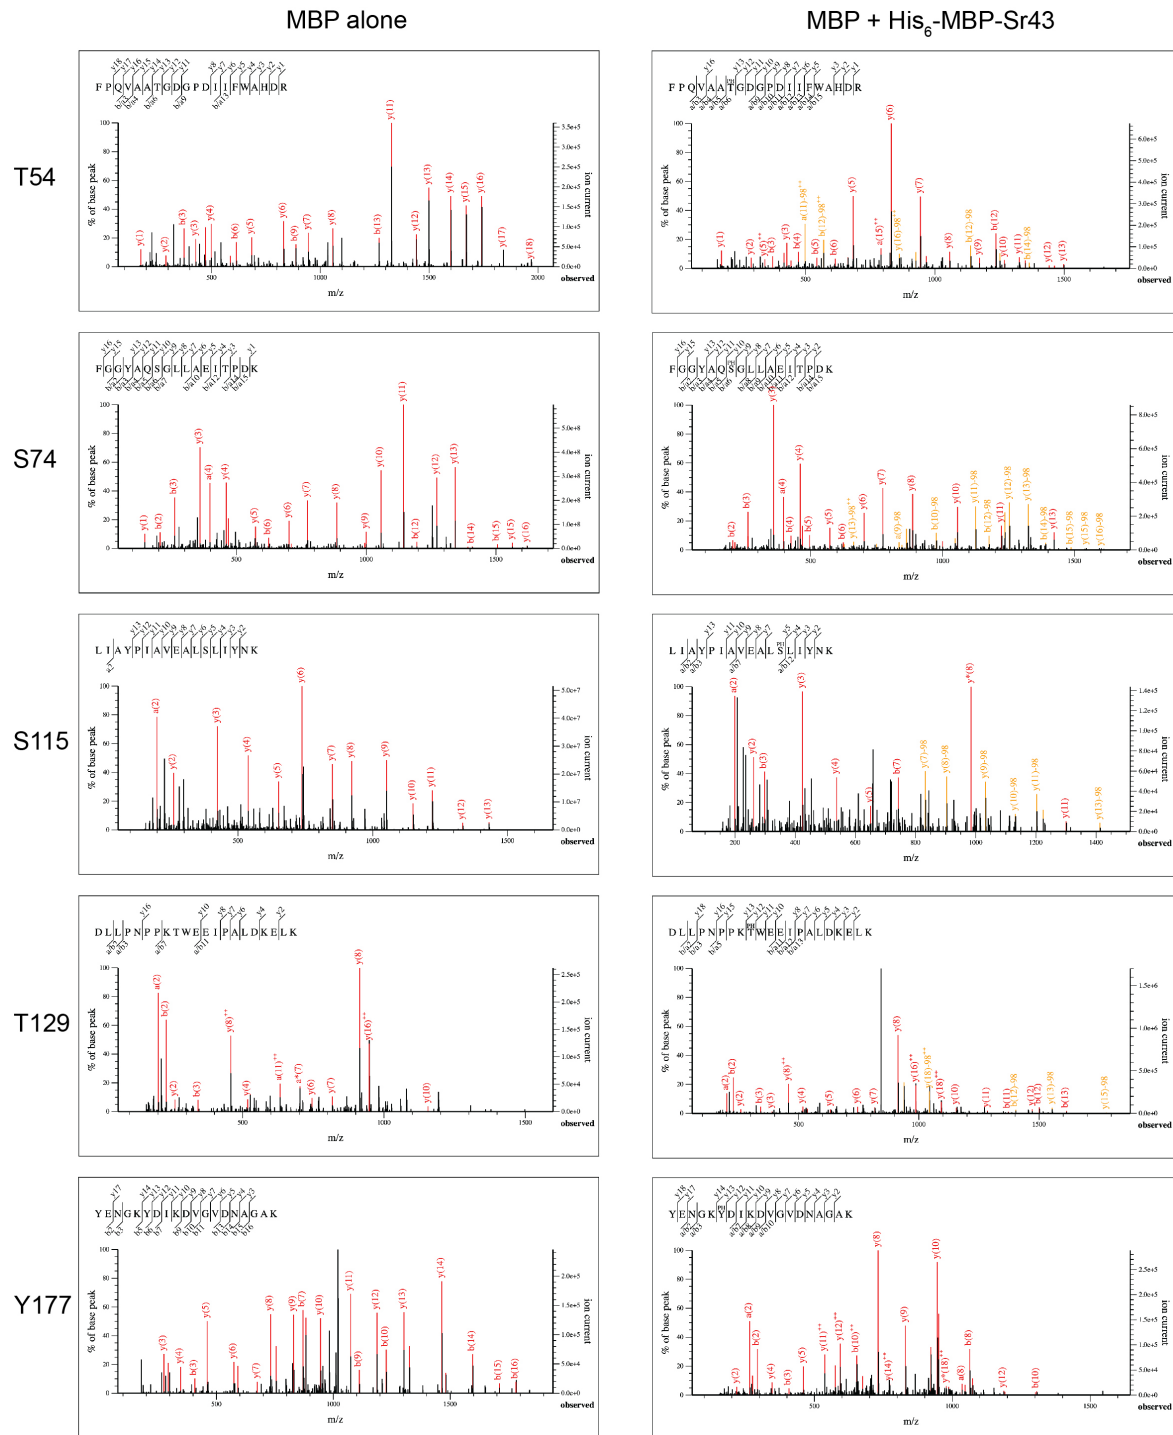

**Supplementary Fig. 15. Mass spectra of the peptides that are targeted by His<sub>6</sub>-MBP-Sr43 for phosphorylation of residues T54, S74, S115, T129 and Y177.** The amino acid numbers are indicated on the left. The spectra on the left panel correspond to the peptides identified from the sample without the kinase added in the reaction. The spectra on the right correspond to the same peptides but phosphorylated on the amino acid.

MBP + His<sub>6</sub>-MBP-Sr43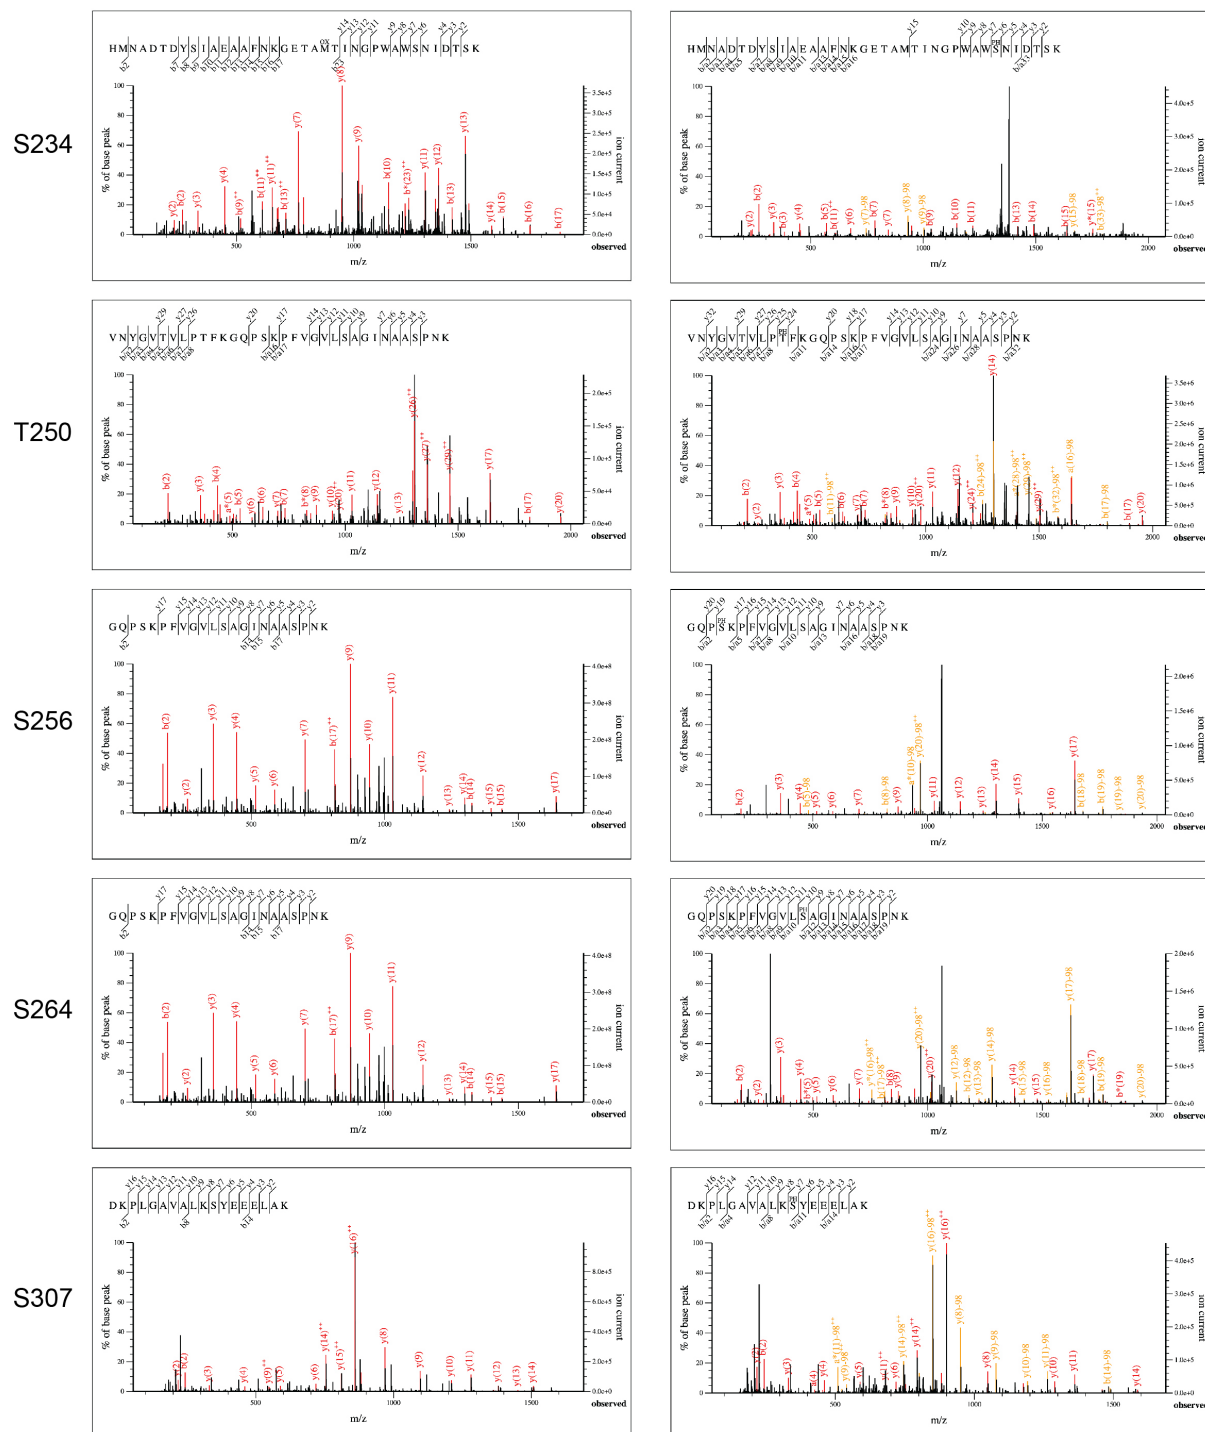

**Supplementary Fig. 16. Mass spectra of the peptides that are targeted by His6-MBP-Sr43 for phosphorylation of residues S234, T250, S256, S264 and S307.** The amino acid numbers are indicated on the left. The spectra on the left panel correspond to the peptides identified from the sample without the kinase added in the reaction. The spectra on the right correspond to the same peptides but phosphorylated on the amino acid.

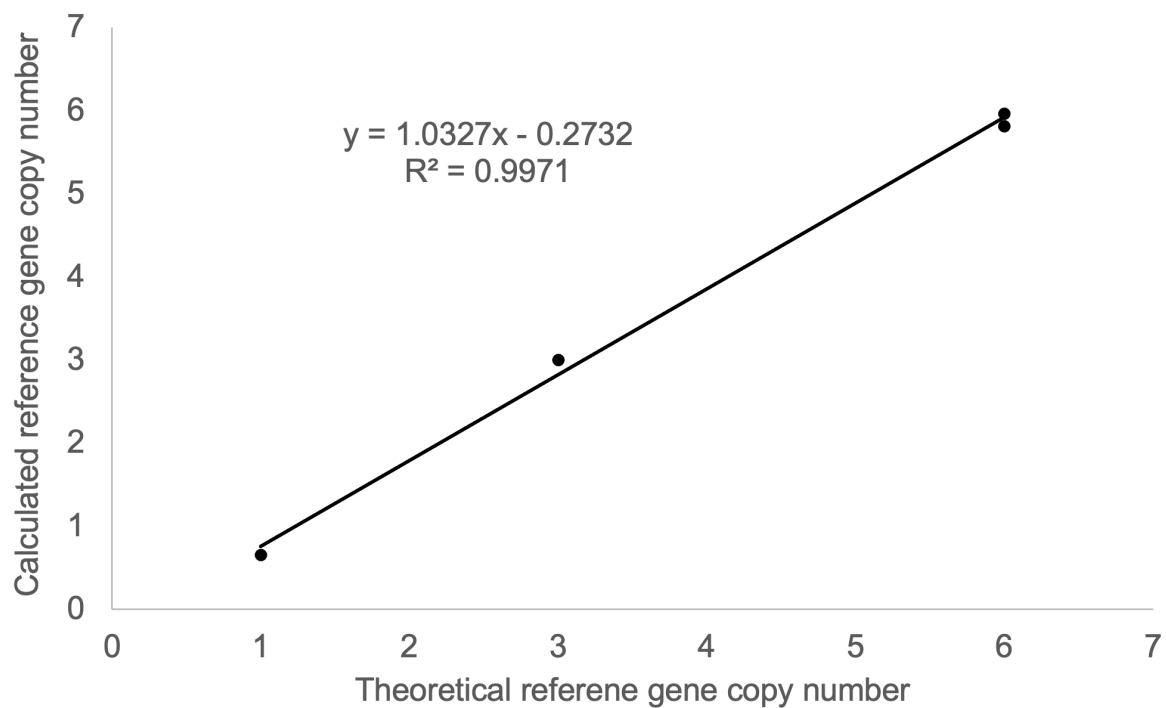

**Supplementary Fig. 17. Regression of calculated reference gene copy number on theoretical reference gene copy number.**
